# Supplementary material for: Measuring Domain-Specific Knowledge: From Bach to Fibonacci
Source: MDPI journal article supplement (doi:10.3390/jintelligence11030047), 2023-02-28
Supplement: s1 [file s1]

## Supplementary Material

Table S1. CFA Results for Knowledge Categories (High Gf Sample).

| Knowledge Category | $\chi^2$ | <i>df</i> | CFI  | RMSEA | SRMR |
|--------------------|----------|-----------|------|-------|------|
| <i>Humanities</i>  |          |           |      |       |      |
| Cl. Music          | 16.14    | 19        | 1    | >.001 | .053 |
| Mod. Music         | 19.07    | 18        | .989 | .012  | .054 |
| Cl. Literature     | 3.68     | 8         | 1    | >.001 | .030 |
| Mod. Literature    | 7.14     | 8         | 1    | >.001 | .049 |
| Art/Arch.          | 39.90    | 32        | .950 | .024  | .070 |
| Sports             | 25.30    | 24        | .955 | .011  | .069 |
| Television         | 12.14    | 11        | .974 | .016  | .054 |
| Geography          | 11.66    | 20        | 1    | >.001 | .046 |
| Medicine           | 12.44    | 13        | 1    | >.001 | .050 |
| <i>Civics</i>      |          |           |      |       |      |
| History            | 49.66    | 50        | 1    | >.001 | .062 |
| Religion           | 20.64    | 24        | 1    | >.001 | .073 |
| Economics          | 10.43    | 14        | 1    | >.001 | .048 |
| Politics           | 25.36    | 25        | .996 | .006  | .059 |
| <i>Science</i>     |          |           |      |       |      |
| Physics            | 24.16    | 26        | 1    | >.001 | .052 |
| Chemistry          | 35.32    | 35        | .995 | .005  | .066 |
| Mathematics        | 22.69    | 23        | 1    | >.001 | .056 |

*Note.*  $n = 415$ . Cl. = Classical, Mod. = Modern, Arch. = Architecture. Robust estimation was used for CFA.

Table S2. CFA Results for Knowledge Categories (Unselected Gf Sample).

| Knowledge Category | $\chi^2$ | <i>df</i> | CFI  | RMSEA | SRMR |
|--------------------|----------|-----------|------|-------|------|
| <i>Humanities</i>  |          |           |      |       |      |
| Cl. Music          | 17.02    | 17        | 1    | .001  | .034 |
| Mod. Music         | 18.10    | 16        | .988 | .011  | .034 |
| Cl. Literature     | 11.05    | 7         | .924 | .024  | .034 |
| Mod. Literature    | 7.45     | 8         | 1    | >.001 | .033 |
| Art/Arch.          | 32.97    | 32        | .998 | .005  | .039 |
| Sports             | 30.79    | 25        | 1    | >.001 | .049 |
| Television         | 16.02    | 11        | .975 | .021  | .037 |
| Geography          | 16.48    | 20        | 1    | >.001 | .034 |
| Medicine           | 15.19    | 13        | .969 | .013  | .038 |
| <i>Civics</i>      |          |           |      |       |      |
| History            | 85.13**  | 52        | .927 | .025  | .050 |
| Religion           | 33.94    | 22        | .941 | .019  | .054 |
| Economics          | 13.21    | 14        | 1    | >.001 | .034 |
| Politics           | 23.26    | 25        | 1    | >.001 | .036 |
| <i>Science</i>     |          |           |      |       |      |
| Physics            | 45.90**  | 26        | .918 | .027  | .047 |
| Chemistry          | 52.70**  | 31        | .946 | .026  | .046 |
| Mathematics        | 9.67     | 15        | 1    | >.001 | .026 |

Note.  $n = 1,035$ . \*\* $p < .01$  Cl. = Classical, Mod. = Modern, Arch. = Architecture. Robust estimation was used for CFA.

Table S3. *Correlation Matrix of Knowledge Categories (Total Sample).*

|                             | (1) | (2)  | (3)  | (4)  | (5)  | (6)  | (7)  | (8)  |
|-----------------------------|-----|------|------|------|------|------|------|------|
| (1) <i>Cl. Music</i>        | 1   |      |      |      |      |      |      |      |
| (2) <i>Mod. Music</i>       | .24 | 1    |      |      |      |      |      |      |
| (3) <i>Cl. Literature</i>   | .19 | .18  | 1    |      |      |      |      |      |
| (4) <i>Mod. Literature</i>  | .19 | .09  | .16  | 1    |      |      |      |      |
| (5) <i>Art/Architecture</i> | .35 | .33  | .32  | .22  | 1    |      |      |      |
| (6) <i>Sports</i>           | .14 | .20  | .06  | .06  | .18  | 1    |      |      |
| (7) <i>Television</i>       | .22 | .33  | .21  | .14  | .33  | .23  | 1    |      |
| (8) <i>Geography</i>        | .29 | .27  | .19  | .12  | .33  | .25  | .19  | 1    |
| (9) <i>Medicine</i>         | .16 | .14  | .12  | .11  | .22  | .16  | .16  | .18  |
| (10) <i>History</i>         | .26 | .25  | .23  | .18  | .29  | .15  | .24  | .31  |
| (11) <i>Religion</i>        | .21 | .29  | .23  | .13  | .27  | .16  | .24  | .24  |
| (12) <i>Economics</i>       | .20 | .21  | .19  | .07  | .30  | .20  | .22  | .19  |
| (13) <i>Politics</i>        | .18 | .23  | .20  | .11  | .28  | .17  | .15  | .20  |
| (14) <i>Physics</i>         | .11 | .13  | .23  | .08  | .16  | .18  | .21  | .13  |
| (15) <i>Chemistry</i>       | .13 | .11  | .16  | .01  | .14  | .09  | .13  | .14  |
| (16) <i>Mathematics</i>     | .05 | .11  | .17  | .14  | .12  | .11  | .16  | .13  |
|                             | (9) | (10) | (11) | (12) | (13) | (14) | (15) | (16) |
| (1) <i>Cl. Music</i>        |     |      |      |      |      |      |      |      |
| (2) <i>Mod. Music</i>       |     |      |      |      |      |      |      |      |
| (3) <i>Cl. Literature</i>   |     |      |      |      |      |      |      |      |
| (4) <i>Mod. Literature</i>  |     |      |      |      |      |      |      |      |
| (5) <i>Art/Architecture</i> |     |      |      |      |      |      |      |      |
| (6) <i>Sports</i>           |     |      |      |      |      |      |      |      |
| (7) <i>Television</i>       |     |      |      |      |      |      |      |      |
| (8) <i>Geography</i>        |     |      |      |      |      |      |      |      |
| (9) <i>Medicine</i>         | 1   |      |      |      |      |      |      |      |
| (10) <i>History</i>         | .18 | 1    |      |      |      |      |      |      |

|                         |     |     |     |     |     |     |     |   |
|-------------------------|-----|-----|-----|-----|-----|-----|-----|---|
| (11) <i>Religion</i>    | .11 | .29 | 1   |     |     |     |     |   |
| (12) <i>Economics</i>   | .09 | .24 | .20 | 1   |     |     |     |   |
| (13) <i>Politics</i>    | .09 | .33 | .28 | .26 | 1   |     |     |   |
| (14) <i>Physics</i>     | .17 | .22 | .23 | .16 | .17 | 1   |     |   |
| (15) <i>Chemistry</i>   | .22 | .13 | .14 | .11 | .05 | .52 | 1   |   |
| (16) <i>Mathematics</i> | .11 | .18 | .16 | .18 | .21 | .34 | .36 | 1 |

Note. N = 1,450. Cl. = Classical, Mod. = Modern.

Table S4. Correlation Matrix of Knowledge Categories (High Gf and Unselected Gf).

|                             | (1)  | (2)  | (3)  | (4)  | (5)  | (6)  | (7)  | (8)  |
|-----------------------------|------|------|------|------|------|------|------|------|
| (1) <i>Cl. Music</i>        | 1    | .24  | .24  | .18  | .35  | .21  | .18  | .29  |
| (2) <i>Mod. Music</i>       | .18  | 1    | .20  | .11  | .31  | .24  | .35  | .25  |
| (3) <i>Cl. Literature</i>   | .03  | .14  | 1    | .19  | .23  | .06  | .10  | .12  |
| (4) <i>Mod. Literature</i>  | .18  | .04  | .08  | 1    | .23  | .06  | .10  | .12  |
| (5) <i>Art/Architecture</i> | .24  | .30  | .27  | .17  | 1    | .17  | .34  | .33  |
| (6) <i>Sports</i>           | .06  | .27  | .10  | .07  | .21  | 1    | .25  | .26  |
| (7) <i>Television</i>       | .20  | .18  | .13  | .15  | .21  | .11  | 1    | .16  |
| (8) <i>Geography</i>        | .20  | .27  | .10  | .08  | .31  | .20  | .11  | 1    |
| (9) <i>Medicine</i>         | .11  | .16  | .16  | .14  | .22  | .22  | .09  | .11  |
| (10) <i>History</i>         | .28  | .20  | .08  | .15  | .27  | .17  | .22  | .29  |
| (11) <i>Religion</i>        | .16  | .22  | .06  | .05  | .27  | .26  | .11  | .26  |
| (12) <i>Economics</i>       | .13  | .21  | .10  | -.02 | .28  | .14  | .18  | .16  |
| (13) <i>Politics</i>        | .15  | .20  | .02  | .05  | .32  | .18  | .07  | .21  |
| (14) <i>Physics</i>         | .04  | .02  | .08  | .03  | .17  | .17  | .08  | .004 |
| (15) <i>Chemistry</i>       | .08  | -.04 | .01  | -.03 | .03  | .10  | .05  | .04  |
| (16) <i>Mathematics</i>     | -.04 | .09  | .09  | .16  | .14  | .14  | .11  | .05  |
|                             | (9)  | (10) | (11) | (12) | (13) | (14) | (15) | (16) |
| (1) <i>Cl. Music</i>        | .16  | .25  | .21  | .21  | .19  | .12  | .12  | .04  |
| (2) <i>Mod. Music</i>       | .12  | .26  | .35  | .22  | .22  | .16  | .13  | .11  |

|                             |     |     |     |     |     |     |      |     |
|-----------------------------|-----|-----|-----|-----|-----|-----|------|-----|
| (3) <i>Cl. Literature</i>   | .10 | .26 | .17 | .21 | .21 | .23 | .18  | .16 |
| (4) <i>Mod. Literature</i>  | .10 | .19 | .17 | .09 | .11 | .10 | -.01 | .12 |
| (5) <i>Art/Architecture</i> | .20 | .30 | .35 | .30 | .26 | .13 | .13  | .09 |
| (6) <i>Sports</i>           | .14 | .15 | .11 | .22 | .17 | .21 | .09  | .09 |
| (7) <i>Television</i>       | .14 | .19 | .24 | .21 | .14 | .16 | .08  | .13 |
| (8) <i>Geography</i>        | .17 | .31 | .23 | .20 | .19 | .16 | .16  | .14 |
| (9) <i>Medicine</i>         | 1   | .13 | .16 | .08 | .05 | .14 | .20  | .08 |
| (10) <i>History</i>         | .14 | 1   | .29 | .24 | .31 | .21 | .12  | .18 |
| (11) <i>Religion</i>        | .07 | .38 | 1   | .14 | .19 | .16 | .13  | .03 |
| (12) <i>Economics</i>       | .06 | .20 | .15 | 1   | .26 | .15 | .10  | .19 |
| (13) <i>Politics</i>        | .15 | .39 | .35 | .26 | 1   | .15 | .04  | .21 |
| (14) <i>Physics</i>         | .14 | .23 | .17 | .13 | .17 | 1   | .46  | .31 |
| (15) <i>Chemistry</i>       | .14 | .07 | .11 | .08 | .04 | .44 | 1    | .31 |
| (16) <i>Mathematics</i>     | .11 | .14 | .07 | .12 | .25 | .24 | .21  | 1   |

---

*Note.*  $n(\text{high Gf}) = 415$ ,  $n(\text{average Gf}) = 1,035$ . Cl. = Classical, Mod. = Modern. Lower diagonal for high Gf and upper diagonal for unselected Gf.
